# Supplementary material for: Hepatitis C Reinfection in People Who Inject Drugs in Resource-Limited Countries: A Systematic Review and Analysis
Source: PubMed Central journal article supplement (PMC7400365; doi:10.3390/ijerph17144951), 2020-07-09
Supplement: ijerph-17-04951-s001.pdf [file ijerph-17-04951-s001.pdf]

# Supplementary Materials: Hepatitis C Reinfection in People Who Inject Drugs in Resource-Limited Countries: A Systematic Review and Analysis

Abbe Muller, David Vlahov, Matthew J. Akiyama and Ann Kurth

Table S1. Sample search strategy.

| Database | Search Strategy                                                                                                                                                                                                                                                                                                                                                                                                                                                                                                                                                                                                                                                                                                                                                                                                                                                                                                                                  |
|----------|--------------------------------------------------------------------------------------------------------------------------------------------------------------------------------------------------------------------------------------------------------------------------------------------------------------------------------------------------------------------------------------------------------------------------------------------------------------------------------------------------------------------------------------------------------------------------------------------------------------------------------------------------------------------------------------------------------------------------------------------------------------------------------------------------------------------------------------------------------------------------------------------------------------------------------------------------|
| Medline  | exp Recurrence/<br>Reinfection.mp.<br>Relapse.mp.<br>recurrence.mp.<br>2 or 3 or 4<br>1 or 2 or 3 or 4<br>exp Drug Users/<br>exp Substance-Related Disorders/<br>exp Substance Abuse, Intravenous/<br>drug disorder.mp.<br>drug-use.mp.<br>PWID.mp.<br>exp IDU or IVDU or drug depend** or substance use* or substance<br>misuse* or substance abuse* or drug addict* or opioid substitution* or<br>OST or opioid agonist* or OAT or opioid maintenance* or opiate<br>substitution* or opiate maintenance* or opiate agonist* or methadone<br>therap* or methadone treat* or methadone maintenance* or MMT or<br>buprenorphine therap* or buprenorphine treat* or buprenorphine<br>maintenance* or medication-assisted treat* or medication assisted<br>treat* or MAT or opioid treat* or Opiate Substitution Treatment[mh]<br>or Substance Abuse, Intravenous[mh]<br>exp Drug Misuse/<br>drug misuse.mp.<br>7 or 8 or 9 or 10 or 11 or 12 or 13 |

---

exp Hepatitis C/  
exp Hepacivirus/  
hepatitis c.mp.  
HCV.mp.  
hep c.mp.  
15 or 16 or 17 or 18 or 19  
6 and 14 and 20

---

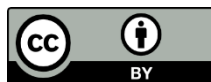

© 2020 by the authors. Submitted for possible open access publication under the terms and conditions of the Creative Commons Attribution (CC BY) license (<http://creativecommons.org/licenses/by/4.0/>).
